# Supplementary material for: A Fixed Ratio Combination of Insulin Degludec and Liraglutide (IDegLira) Reduces Glycemic Fluctuation and Brings More Patients with Type 2 Diabetes Within Blood Glucose Target Ranges
Source: PubMed Central journal article supplement — Diabetes Technol Ther. 2017 Apr 1;19(4):255–64. doi: 10.1089/dia.2016.0405 (PMC5399738; doi:10.1089/dia.2016.0405), 2017-04-01
Supplement: Supp_Data.pdf [file Supp_Data.pdf]

## Supplementary Data

**Formula S1.** Calculation of IG fluctuation from continuous glucose monitoring profiles

$$\frac{1}{T} \int_0^T |IG(t) - \overline{IG}| dt$$

IG, interstitial glucose;  $IG(t)$ , IG value at time  $t$ ;  $\overline{IG}$ , mean IG from the patient profile;  $T$ , duration of continuous glucose monitoring profile (excluding gaps with no, or invalid IG measurements).

SUPPLEMENTARY TABLE S1. DUAL I EXTENSION BASELINE CHARACTERISTICS

| Characteristic                         | IDegLira (n=833)        | IDeg (n=413)            | Liraglutide (n=414)     |
|----------------------------------------|-------------------------|-------------------------|-------------------------|
| Female/male, %                         | 48/52                   | 52/48                   | 50/50                   |
| Age, years                             | 55.1 (9.9)              | 54.9 (9.7)              | 55.0 (10.2)             |
| BMI, kg/m <sup>2</sup>                 | 31.2 (5.2)              | 31.2 (5.3)              | 31.3 (4.8)              |
| Duration of diabetes, years            | 6.6 (5.1)               | 7.0 (5.3)               | 7.2 (6.1)               |
| HbA <sub>1c</sub> , %                  | 8.3 (0.9)               | 8.3 (1.0)               | 8.3 (0.9)               |
| HbA <sub>1c</sub> , mmol/mol           | 67 (9.7)                | 67 (10.7)               | 67 (10.3)               |
| FPG, mmol/L                            | 9.2 (2.4)               | 9.4 (2.7)               | 9.0 (2.6)               |
| SMBG, <sup>a</sup> mmol/L              |                         |                         |                         |
| Before bedtime                         | 10.8 (3.2) <sup>c</sup> | 11.0 (3.3) <sup>f</sup> | 10.7 (3.4) <sup>i</sup> |
| 04:00                                  | 9.3 (2.6) <sup>d</sup>  | 9.2 (2.5) <sup>g</sup>  | 9.1 (2.8) <sup>j</sup>  |
| Fasting C-peptide, nmol/L <sup>b</sup> | 0.72 (46) <sup>e</sup>  | 0.71 (54) <sup>h</sup>  | 0.68 (51) <sup>k</sup>  |

Values are mean (SD) unless otherwise stated. Adapted from Gough et al.<sup>15</sup>

<sup>a</sup>SMBG assessed with glucose meter as plasma equivalent values of capillary whole blood glucose.

<sup>b</sup>Values are geometric mean (CV).

<sup>c</sup>n = 788.

<sup>d</sup>n = 790.

<sup>e</sup>n = 803.

<sup>f</sup>n = 392.

<sup>g</sup>n = 397.

<sup>h</sup>n = 402.

<sup>i</sup>n = 393.

<sup>j</sup>n = 401.

<sup>k</sup>n = 398.

BMI, body mass index; CV, coefficient of variation; FPG, fasting plasma glucose; HbA<sub>1c</sub>, glycated hemoglobin; IDeg, insulin degludec; IDegLira, fixed-ratio combination of insulin degludec and liraglutide; SD, standard deviation; SMBG, self-monitored blood glucose.

SUPPLEMENTARY TABLE S2. DUAL II  
BASELINE CHARACTERISTICS

| <i>Characteristic</i>                  | <i>IDegLira</i><br><i>n=199</i> | <i>IDeg</i><br><i>n=199</i> |
|----------------------------------------|---------------------------------|-----------------------------|
| Female/male, %                         | 44/56                           | 47/53                       |
| Age, years                             | 56.8 (8.9)                      | 57.5 (10.5)                 |
| BMI, kg/m <sup>2</sup>                 | 33.6 (5.7)                      | 33.8 (5.6)                  |
| Duration of diabetes, years            | 10.3 (6.0)                      | 10.9 (7.0)                  |
| HbA <sub>1c</sub> , %                  | 8.7 (0.7)                       | 8.8 (0.7)                   |
| HbA <sub>1c</sub> , mmol/mol           | 72 (8)                          | 73 (8)                      |
| FPG, mmol/L                            | 9.7 (2.9)                       | 9.6 (3.1)                   |
| SMBG, <sup>a</sup> mmol/L              |                                 |                             |
| Before bedtime                         | 11.9 (3.5) <sup>c</sup>         | 11.5 (3.3) <sup>e</sup>     |
| 04:00                                  | 9.1 (3.2) <sup>d</sup>          | 9.2 (3.0) <sup>f</sup>      |
| Fasting C-peptide, nmol/L <sup>b</sup> | 0.54 (54)                       | 0.50 (59) <sup>g</sup>      |

Full analysis set. Values are mean (SD) unless otherwise stated. Adapted from Buse et al.<sup>13</sup>

<sup>a</sup>SMBG assessed with glucose meter as plasma equivalent values of capillary whole blood glucose.

<sup>b</sup>Values are geometric mean (CV).

<sup>c</sup>n=193

<sup>d</sup>n=191.

<sup>e</sup>n=194.

<sup>f</sup>n=193.

<sup>g</sup>n=198.

SUPPLEMENTARY TABLE S3. OVERVIEW OF MISSING CONTINUOUS GLUCOSE MONITORING  
DATA AT BASELINE AND WEEK 52

| <i>Time point</i>      | <i>Reason for missing data</i>             | <i>IDegLira</i><br>(n=131), n (%) | <i>IDeg</i><br>(n=64), n (%) | <i>Liraglutide</i><br>(n=65), n (%) |
|------------------------|--------------------------------------------|-----------------------------------|------------------------------|-------------------------------------|
| Baseline               | All                                        | 27 (21)                           | 11 (17)                      | 13 (20)                             |
|                        | CGM download, upload, or recording failure | 6 (5)                             | 2 (3)                        | 4 (6)                               |
|                        | Technical problem with CGM sensor          | 2 (2)                             | —                            | 1 (2)                               |
|                        | Withdrawal of subject <sup>a</sup>         | —                                 | —                            | 2 (3)                               |
|                        | Other                                      | 3 (2)                             | —                            | —                                   |
|                        | No information                             | 16 (12)                           | 9 (14)                       | 6 (9)                               |
| Week 52                | All                                        | 48 (37)                           | 29 (45)                      | 23 (35)                             |
|                        | CGM download, upload, or recording failure | 11 (8)                            | 7 (11)                       | 3 (5)                               |
|                        | Technical problem with CGM sensor          | 1 (1)                             | 1 (2)                        | —                                   |
|                        | Withdrawal of subject <sup>a</sup>         | 23 (18)                           | 13 (20)                      | 13 (20)                             |
|                        | Site closed prematurely                    | 11 (8)                            | 5 (8)                        | 5 (8)                               |
|                        | Other                                      | 1 (1)                             | 3 (5)                        | 2 (3)                               |
|                        | No information                             | 1 (1)                             | —                            | —                                   |
| Baseline<br>or week 52 | All                                        | 59 (45)                           | 30 (47)                      | 28 (43)                             |

Values are number of subjects (%).

<sup>a</sup>Withdrawal from trial or sub-study participation. CGM, continuous glucose monitoring.

SUPPLEMENTARY TABLE S4. BASELINE CHARACTERISTICS OF PATIENTS IN THE DUAL I EXTENSION SUB-STUDY WITH USABLE CONTINUOUS GLUCOSE MONITORING DATA AT WEEK 52

| Characteristic                            | IDegLira (n=72)        | IDeg (n=34) | Liraglutide (n=37)     |
|-------------------------------------------|------------------------|-------------|------------------------|
| Female/male, %                            | 43/57                  | 27/73       | 41/59                  |
| Age, years                                | 55.9 (8.5)             | 55.6 (9.3)  | 53.3 (10.7)            |
| BMI, kg/m <sup>2</sup>                    | 33.0 (4.2)             | 32.8 (4.0)  | 33.1 (4.5)             |
| Duration of diabetes, years               | 8.0 (5.9)              | 7.3 (4.7)   | 7.9 (4.8)              |
| HbA <sub>1c</sub> , %                     | 8.1 (0.8)              | 8.0 (0.7)   | 8.2 (1.0)              |
| HbA <sub>1c</sub> , mmol/mol <sup>a</sup> | 65 (9)                 | 64 (8)      | 66 (11)                |
| FPG, mmol/L                               | 9.0 (1.9)              | 9.3 (2.9)   | 8.9 (2.0)              |
| Fasting C-peptide, nmol/L <sup>b</sup>    | 0.69 (47) <sup>c</sup> | 0.69 (59)   | 0.71 (48) <sup>d</sup> |

Values are mean (SD) unless otherwise stated.

<sup>a</sup>Calculated, not measured.

<sup>b</sup>Values are geometric mean (CV).

<sup>c</sup>n=70.

<sup>d</sup>n=36.

SUPPLEMENTARY TABLE S5. GLYCEMIC FLUCTUATION ASSESSED BY MAGE, LBGI, AND HBGI IN PATIENTS WITH TYPE 2 DIABETES TREATED FOR 52 WEEKS IN THE DUAL I EXTENSION CONTINUOUS GLUCOSE MONITORING SUB-STUDY

| CGM parameter    | IDegLira (n=131) | IDeg (n=64) | ETD [95% CI]: IDegLira vs. IDeg   | Lira (n=65) | ETD [95% CI]: IDegLira vs. Lira  |
|------------------|------------------|-------------|-----------------------------------|-------------|----------------------------------|
| MAGE (mmol/L)    |                  |             |                                   |             |                                  |
| Mean at baseline | 3.6 (1.2)        | 3.7 (1.5)   |                                   | 3.7 (1.3)   |                                  |
| Mean Δ, w52      | -1.3 (1.6)       | -0.5 (2.0)  | -0.7 [-1.3 to -0.1]<br>(P=0.0229) | -0.9 (2.2)  | -0.3 [-0.9 to 0.3]<br>(P=0.2939) |
| LBGI (mmol/L)    |                  |             |                                   |             |                                  |
| Mean at baseline | 30.2 (20.7)      | 31.6 (21.0) |                                   | 36.7 (20.2) |                                  |
| Mean Δ, w52      | 17.2 (21.5)      | 13.2 (21.4) | 0.1 [-4.1 to 4.2]<br>(P=0.9819)   | 7.8 (23.0)  | 3.8 [-0.2 to 7.9]<br>(P=0.0622)  |
| HBGI (mmol/L)    |                  |             |                                   |             |                                  |
| Mean at baseline | 65.4 (4.9)       | 65.4 (4.5)  |                                   | 65.7 (5.2)  |                                  |
| Mean Δ, w52      | -7.8 (9.4)       | -5.7 (4.4)  | -2.4 [-5.4 to 0.6]<br>(P=0.1110)  | -5.0 (6.1)  | -2.8 [-5.7 to 0.1]<br>(P=0.0545) |

Values are mean (SD) unless otherwise stated. Parameters are analyzed based on observed data using an ANCOVA method with treatment, region, baseline HbA<sub>1c</sub> stratum (≤8.3% [≤67 mmol/mol], >8.3% [>67 mmol/mol]) and previous OAD treatment as fixed effects and baseline response as covariates.

ANCOVA, analysis of covariance; CI, confidence interval; ETD, estimated treatment difference; HBGI, high blood glucose index; IG, interstitial glucose; LBGI, low blood glucose index; Lira, liraglutide; MAGE, mean amplitude of glycemic excursions; OAD, oral antidiabetic drug; w, week.

SUPPLEMENTARY TABLE S6. EPISODES OF NOCTURNAL LOW INTERSTITIAL GLUCOSE (<3.9 AND <3.1 MMOL/L)  
 AMONG PATIENTS IN THE DUAL I EXTENSION CONTINUOUS GLUCOSE MONITORING SUB-STUDY

|                                                      | <i>IDegLira</i> | <i>IDeg</i> | <i>Lira</i> |
|------------------------------------------------------|-----------------|-------------|-------------|
| IG <3.9 mmol/L during nocturnal period (00:01–05:59) |                 |             |             |
| Episodes, number                                     |                 |             |             |
| Baseline                                             | 12              | 4           | 6           |
| Week 52                                              | 29              | 25          | 5           |
| Rate, number/100 h                                   |                 |             |             |
| Baseline                                             | 2.0             | 1.4         | 2.1         |
| Week 52                                              | 4.5             | 8.0         | 1.5         |
| IG <3.1 mmol/L during nocturnal period (00:01–05:59) |                 |             |             |
| Episodes, number                                     |                 |             |             |
| Baseline                                             | 6               | 6           | 6           |
| Week 52                                              | 13              | 7           | 0           |
| Rate, number/100 h                                   |                 |             |             |
| Baseline                                             | 1.0             | 2.0         | 2.1         |
| Week 52                                              | 2.0             | 2.2         | 0           |

Sub-study analysis set.

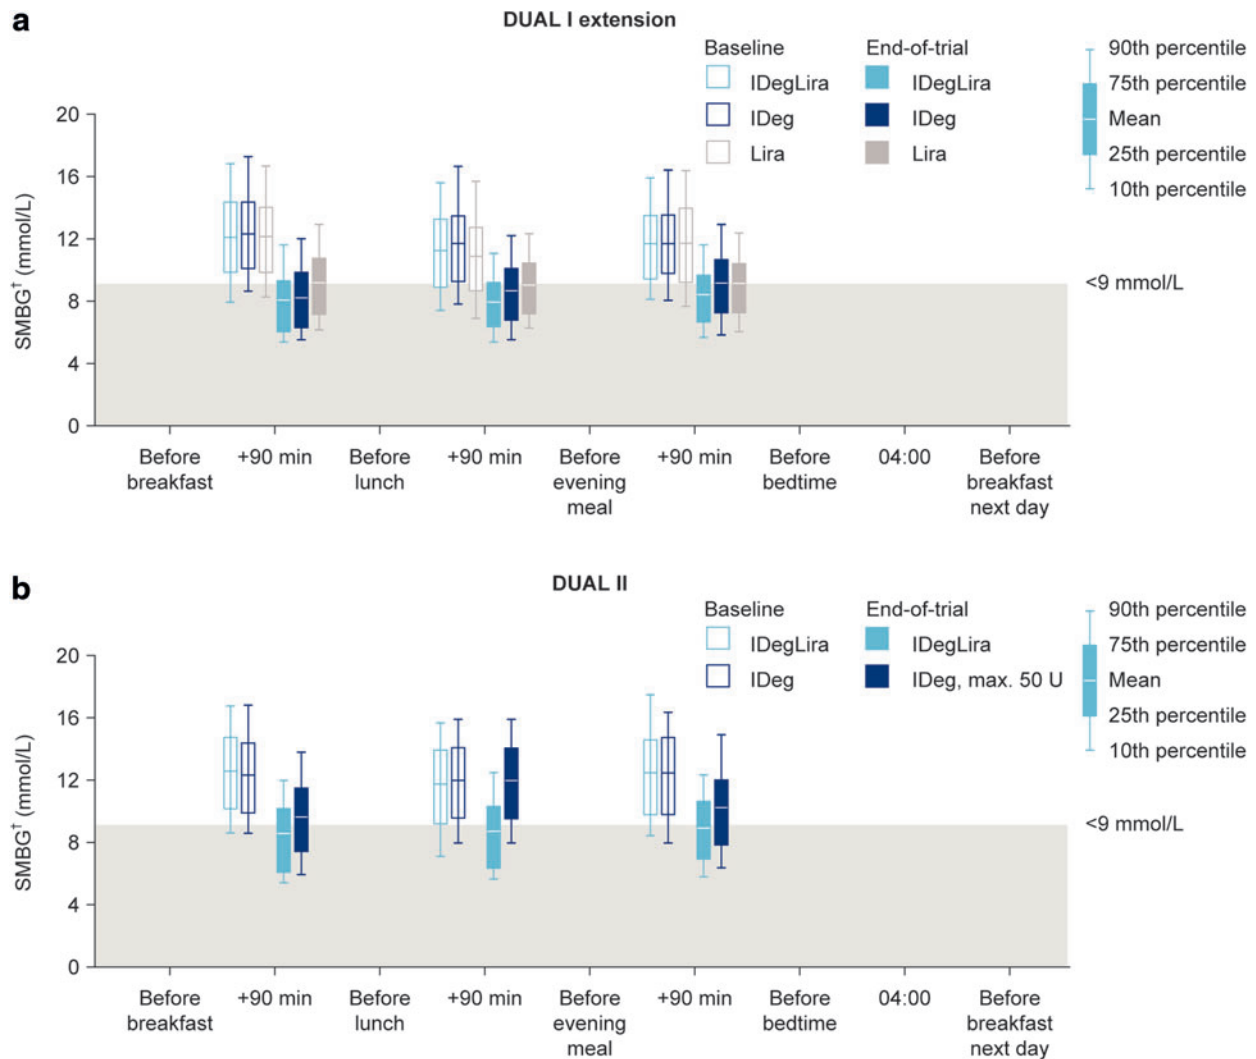

**SUPPLEMENTARY FIG. S1.** Distribution of postprandial SMBG\* measurements across treatment arms in (a) DUAL I and (b) DUAL II at baseline and EOT. \*SMBG assessed with glucose meter as plasma equivalent values of capillary whole blood glucose. Data are based on FAS, with LOCF for all subjects with a full nine-point profile at baseline. EOT, end-of-trial; FAS, full analysis set; IDeg, insulin degludec; IDegLira, fixed-ratio combination of insulin degludec and liraglutide; Lira, liraglutide; LOCF, last observation carried forward; SMBG, self-monitored blood glucose.

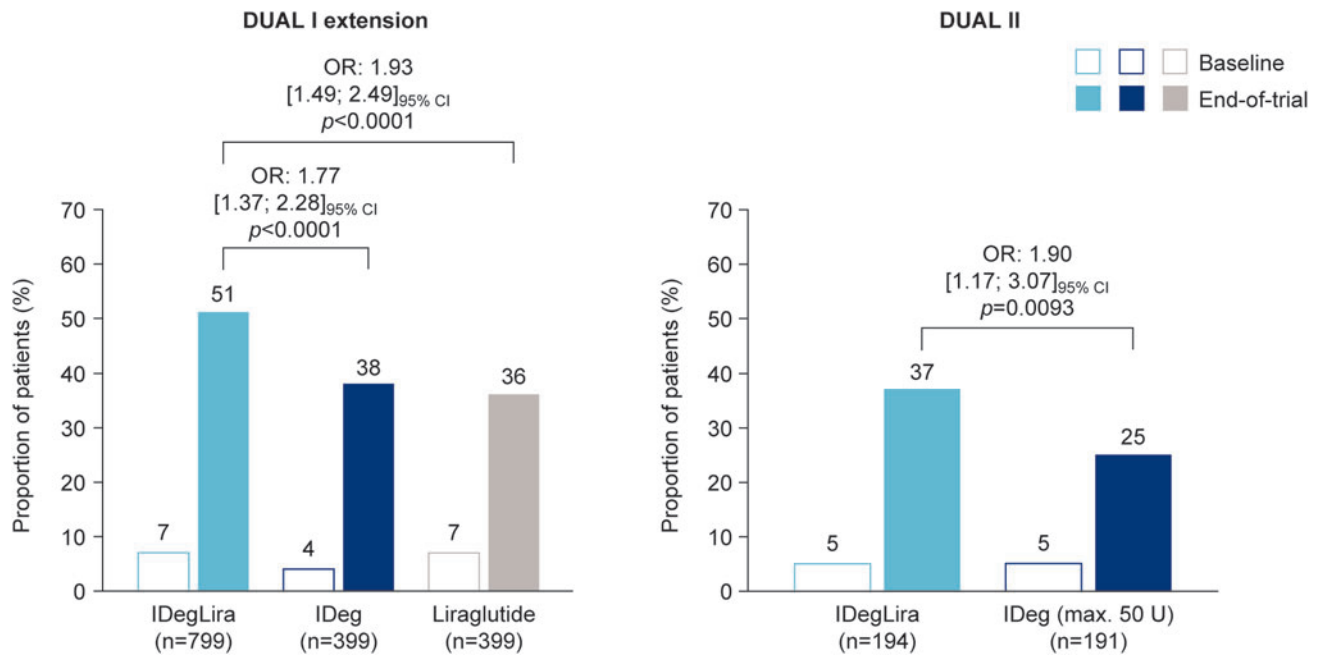

**SUPPLEMENTARY FIG. S2.** Proportion of patients with all three postprandial SMBG assessments  $<9.0$  mmol/L. SMBG assessed with glucose meter as plasma equivalent values of capillary whole blood glucose. Data are based on FAS, with LOCF for all patients with a full nine-point profile at baseline;  $P$ -values are derived from logistic regression with treatment, region, baseline HbA<sub>1c</sub> stratum ( $\leq 8.3\%$  [ $\leq 67$  mmol/mol],  $>8.3\%$  [ $>67$  mmol/mol]), and previous OAD treatment as fixed effects. HbA<sub>1c</sub>, glycosylated hemoglobin; OAD, oral antidiabetic drug; OR, odds ratio.

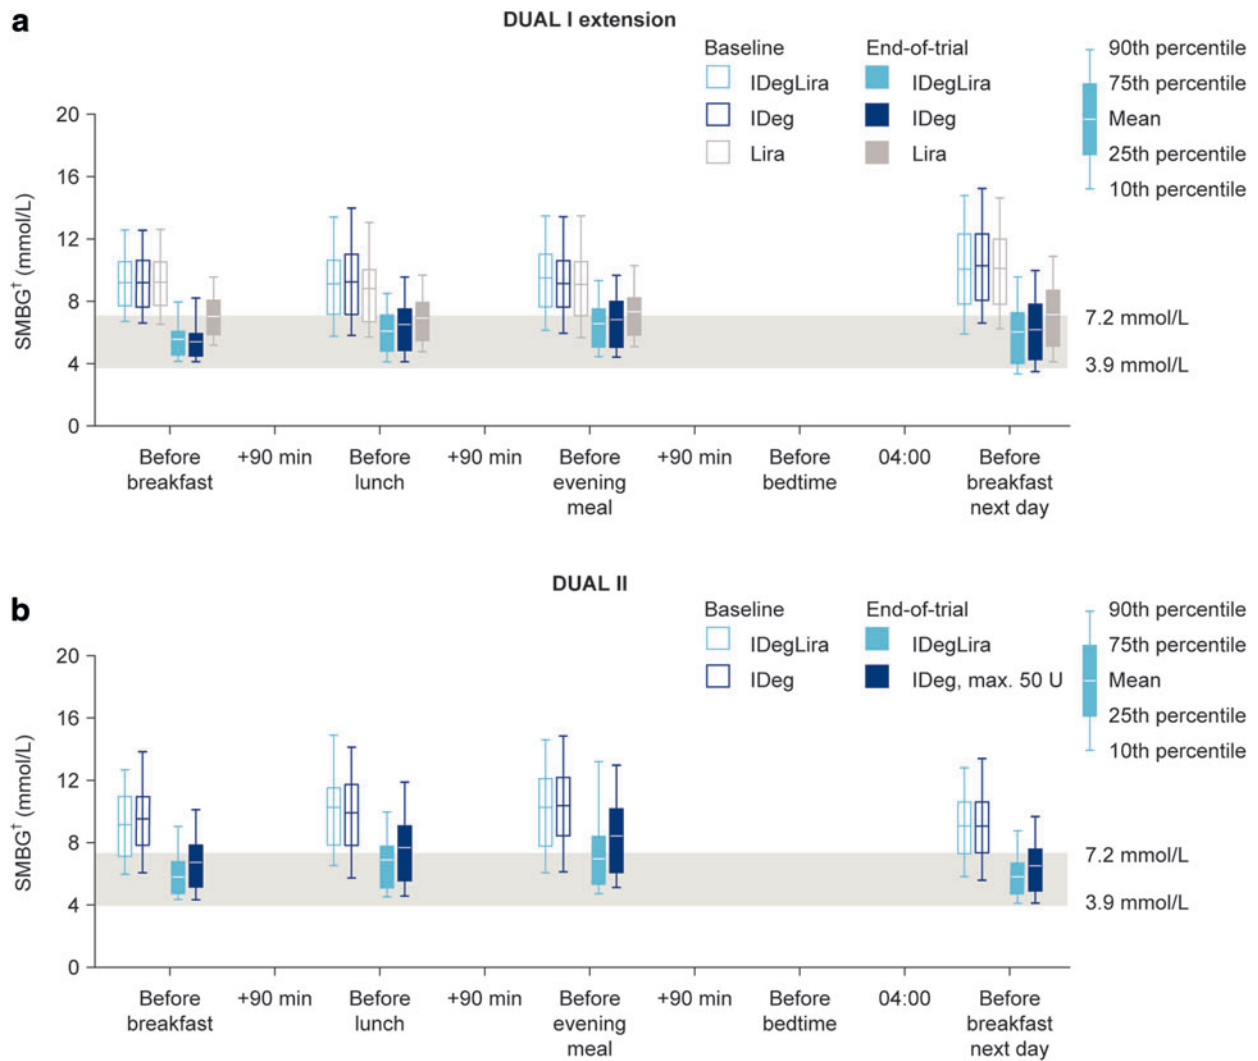

**SUPPLEMENTARY FIG. S3.** Distribution of preprandial SMBG\* measurements across treatment arms in (a) DUAL I and (b) DUAL II at baseline and EOT. \*SMBG assessed with glucose meter as plasma equivalent values of capillary whole blood glucose. Data are based on FAS, with LOCF for all patients with a full nine-point profile at baseline..

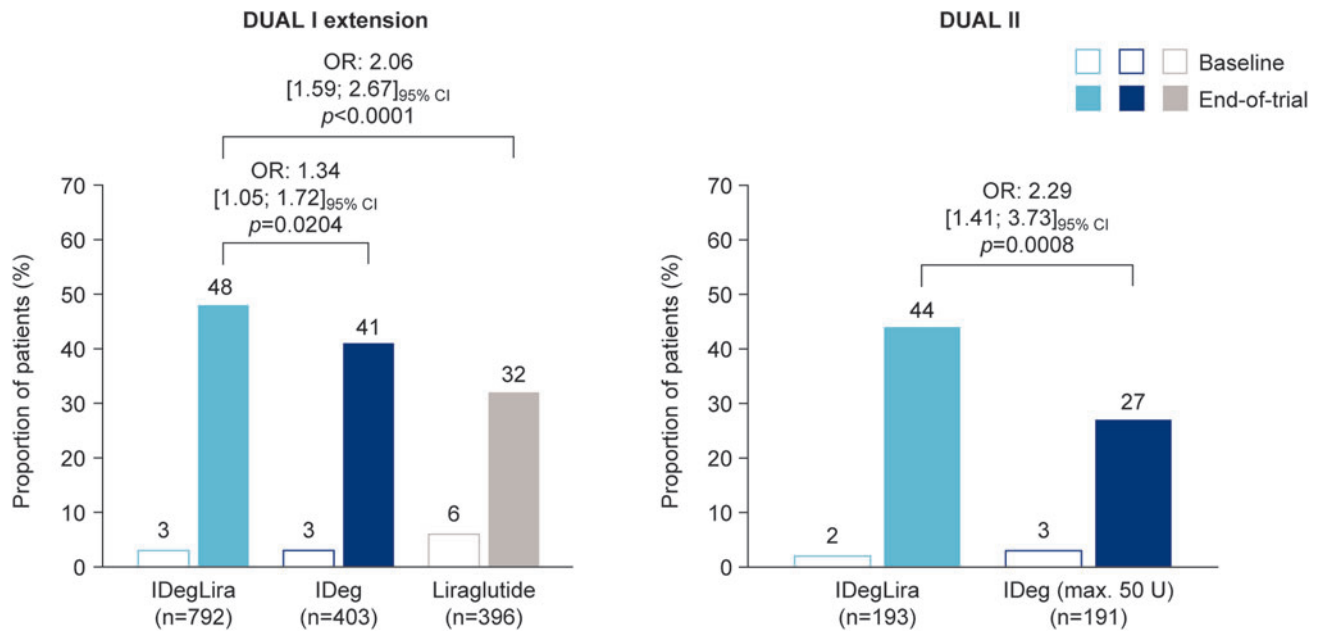

**SUPPLEMENTARY FIG. S4.** Proportion of patients with all four preprandial SMBG\* assessments 3.9–7.2 mmol/L. \*SMBG assessed with glucose meter as plasma equivalent values of capillary whole blood glucose. Data are based on FAS, with LOCF for all patients with a full nine-point profile at baseline;  $P$ -values are derived from logistic regression with treatment, region, baseline HbA<sub>1c</sub> stratum ( $\leq 8.3\%$  [ $\leq 67$  mmol/mol],  $> 8.3\%$  [ $> 67$  mmol/mol]), and previous OAD treatment as fixed effects..



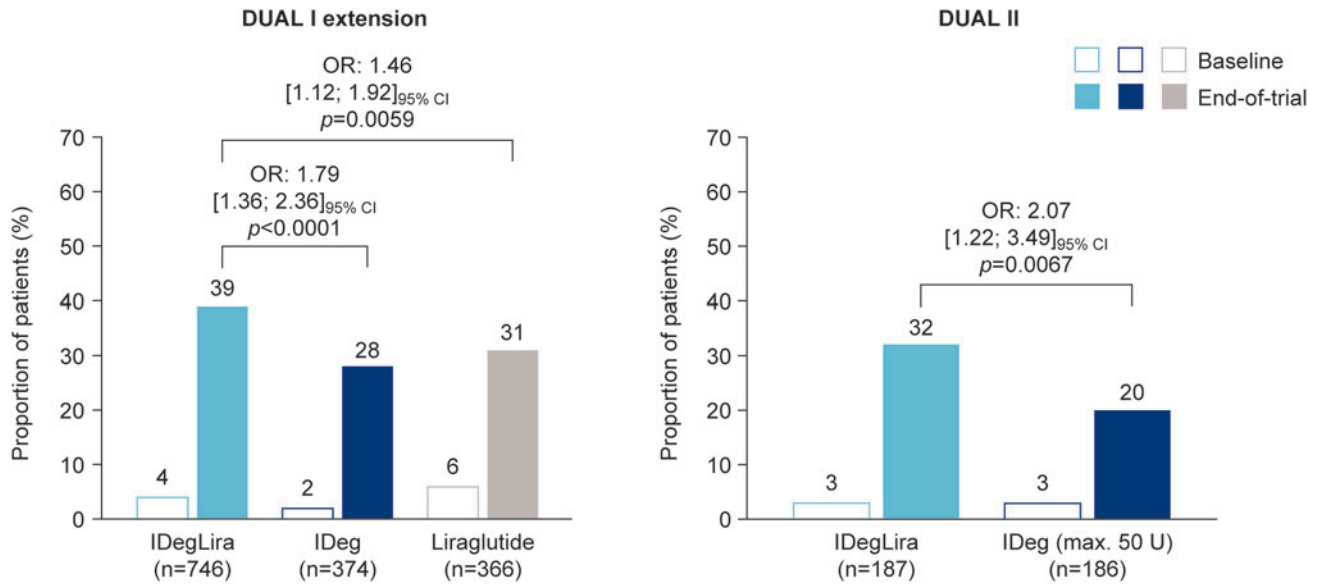

**SUPPLEMENTARY FIG. S5.** Proportion of patients with all nine SMBG\* values between 3.9 and <9 mmol/L. \*SMBG assessed with glucose meter as plasma equivalent values of capillary whole blood glucose. Data are based on FAS, with LOCF for all patients with a full nine-point profile at baseline;  $P$ -values are derived from logistic regression with treatment, region, baseline HbA<sub>1c</sub> stratum ( $\leq 8.3\%$  [ $\leq 67$  mmol/mol],  $> 8.3\%$  [ $> 67$  mmol/mol]) and previous OAD treatment as fixed effects..
